# Supplementary material for: Temporal genomic contrasts reveal rapid evolutionary responses in an alpine mammal during recent climate change
Source: PubMed Central journal article supplement (PMC6519841; doi:10.1371/journal.pgen.1008119), 2019-05-03
Supplement: pgen.1008119.s002.pdf [file pgen.1008119.s002.pdf]

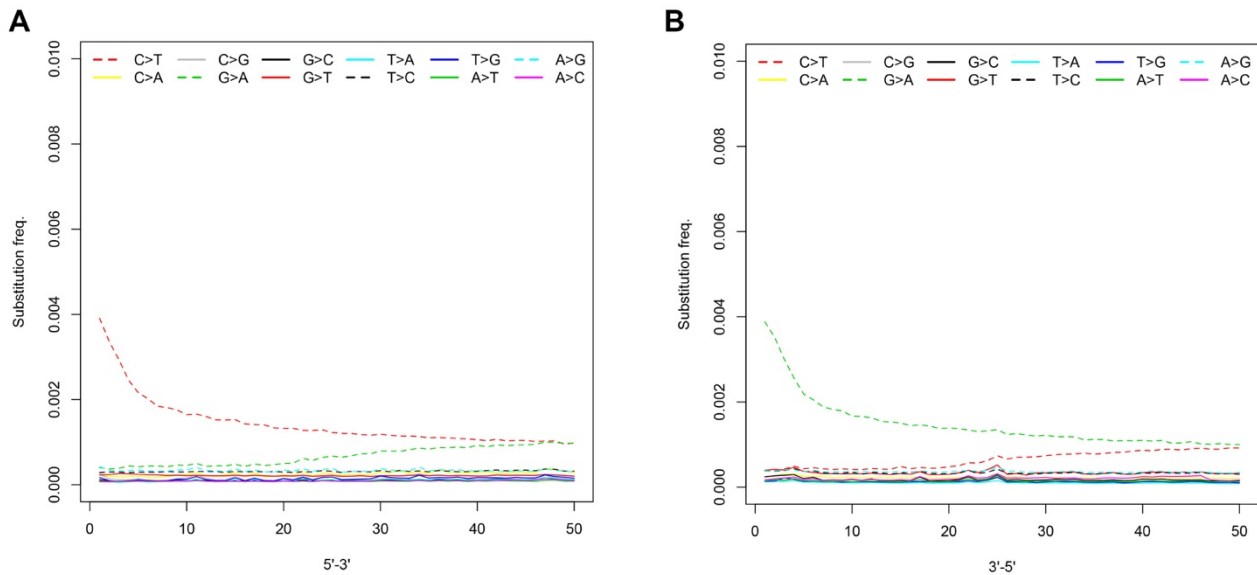

**S1 Fig. Patterns of base misincorporations in historic samples.** The frequencies of the 12 types of substitutions (y-axis) are plotted as a function of distance from the 5' and 3'-ends of the DNA molecules (x-axis). The first 50 bp of the reads are shown. The substitution frequency of each particular type is calculated as the proportion of a particular alternative (non-reference) base type at a given site along the read, and is coded in different colors and line patterns as indicated at the top of the plots: “X-> Y” indicates a change from reference base type X to alternative base type Y.
