# Supplementary material for: Temporal genomic contrasts reveal rapid evolutionary responses in an alpine mammal during recent climate change
Source: PubMed Central journal article supplement (PMC6519841; doi:10.1371/journal.pgen.1008119), 2019-05-03
Supplement: pgen.1008119.s003.pdf [file pgen.1008119.s003.pdf]

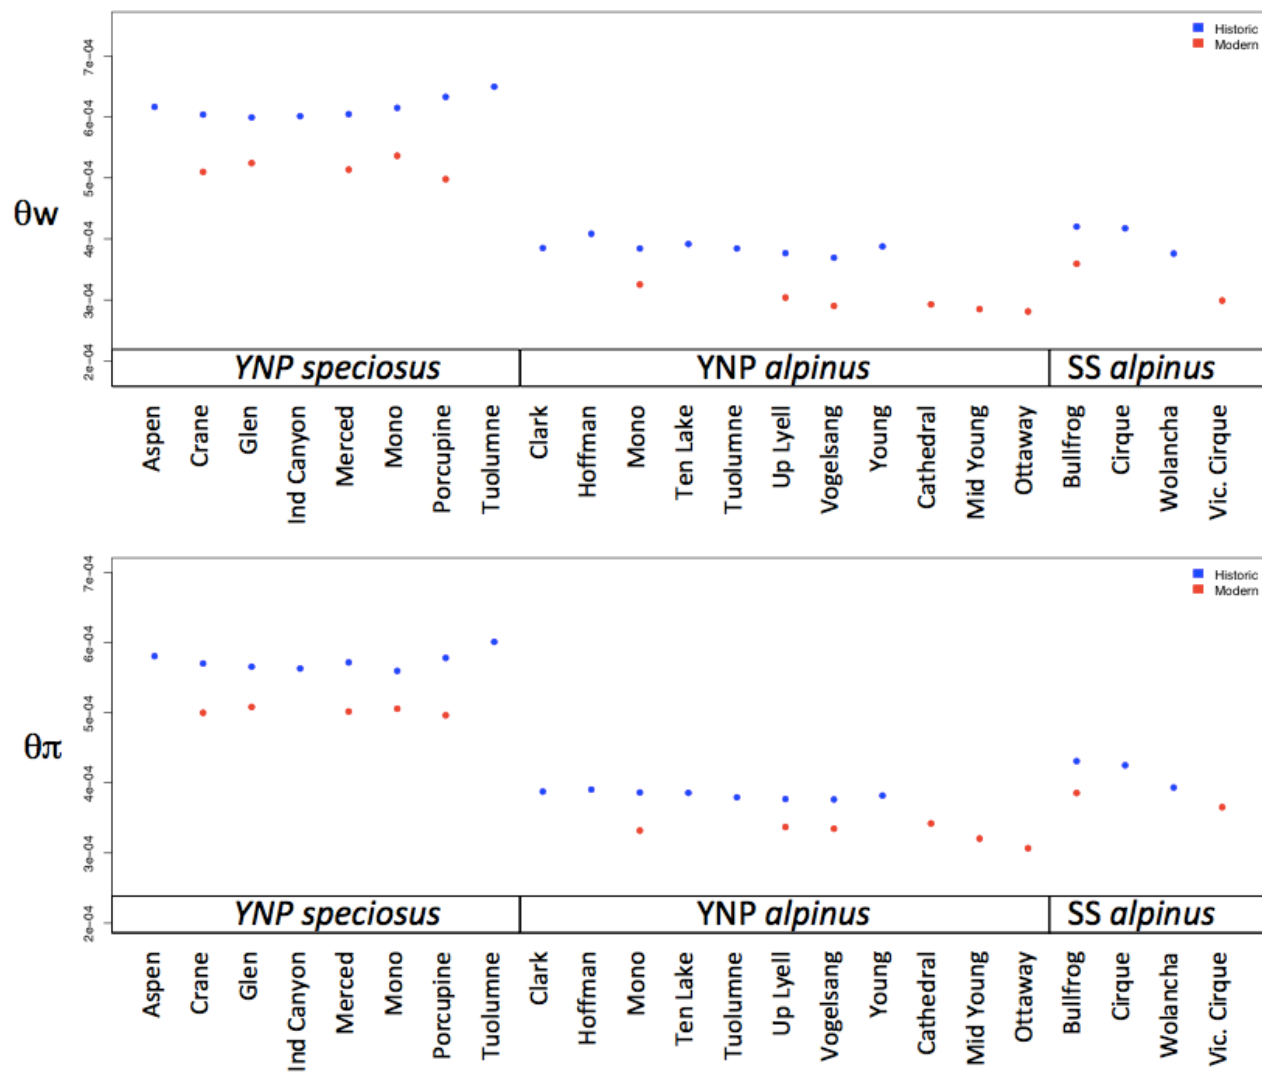

**S2 Fig. Per deme estimates of nucleotide diversity for historical and modern samples of *T. speciosus* and *T. alpinus*.** Estimates represented by a single point reflect demes that were only sampled at a single timepoint.
