# Supplementary material for: Temporal genomic contrasts reveal rapid evolutionary responses in an alpine mammal during recent climate change
Source: PubMed Central journal article supplement (PMC6519841; doi:10.1371/journal.pgen.1008119), 2019-05-03
Supplement: pgen.1008119.s009.pdf [file pgen.1008119.s009.pdf]

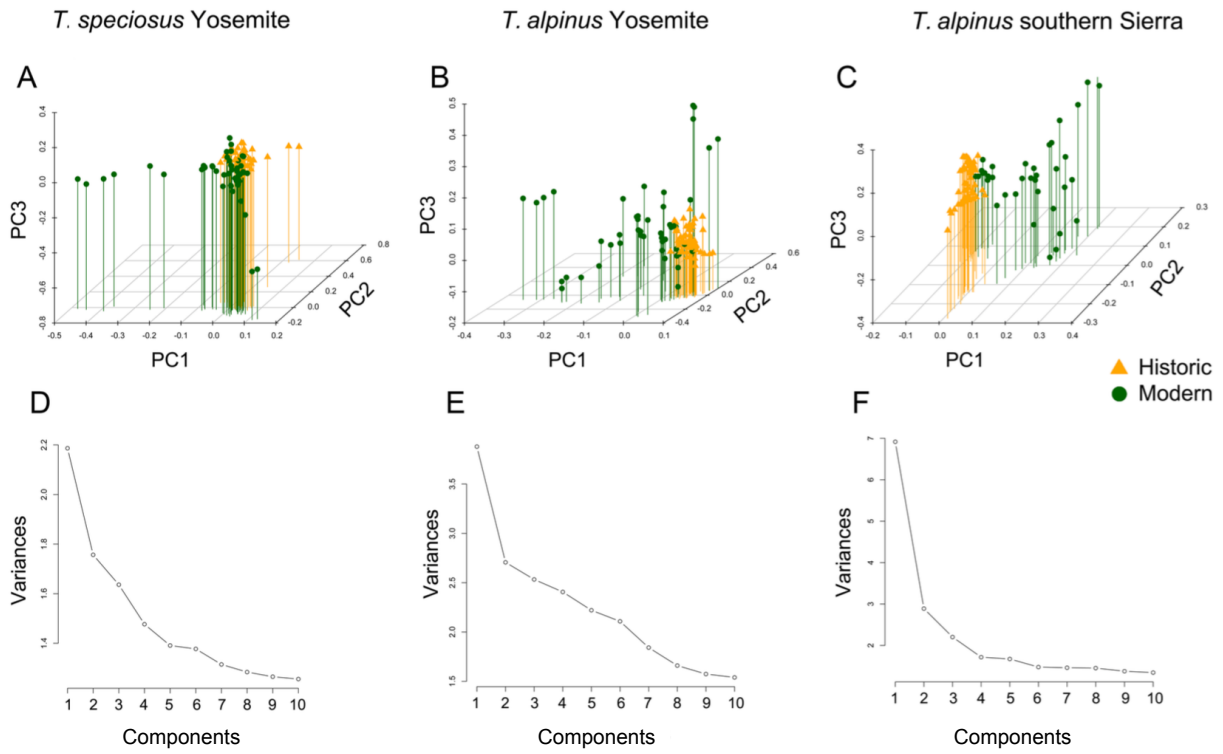

**S8 Fig. Principal Component Analysis (PCA) plots based on genetic covariance among individuals.** The first 3 principal components (PCs) are shown in (A-C). Each point in the PCA plot represents an individual specimen. The proportion of the genetic variance explained by the first 10 PCs is shown in (D-F).
