# Supplementary material for: Temporal genomic contrasts reveal rapid evolutionary responses in an alpine mammal during recent climate change
Source: PubMed Central journal article supplement (PMC6519841; doi:10.1371/journal.pgen.1008119), 2019-05-03
Supplement: pgen.1008119.s010.pdf [file pgen.1008119.s010.pdf]

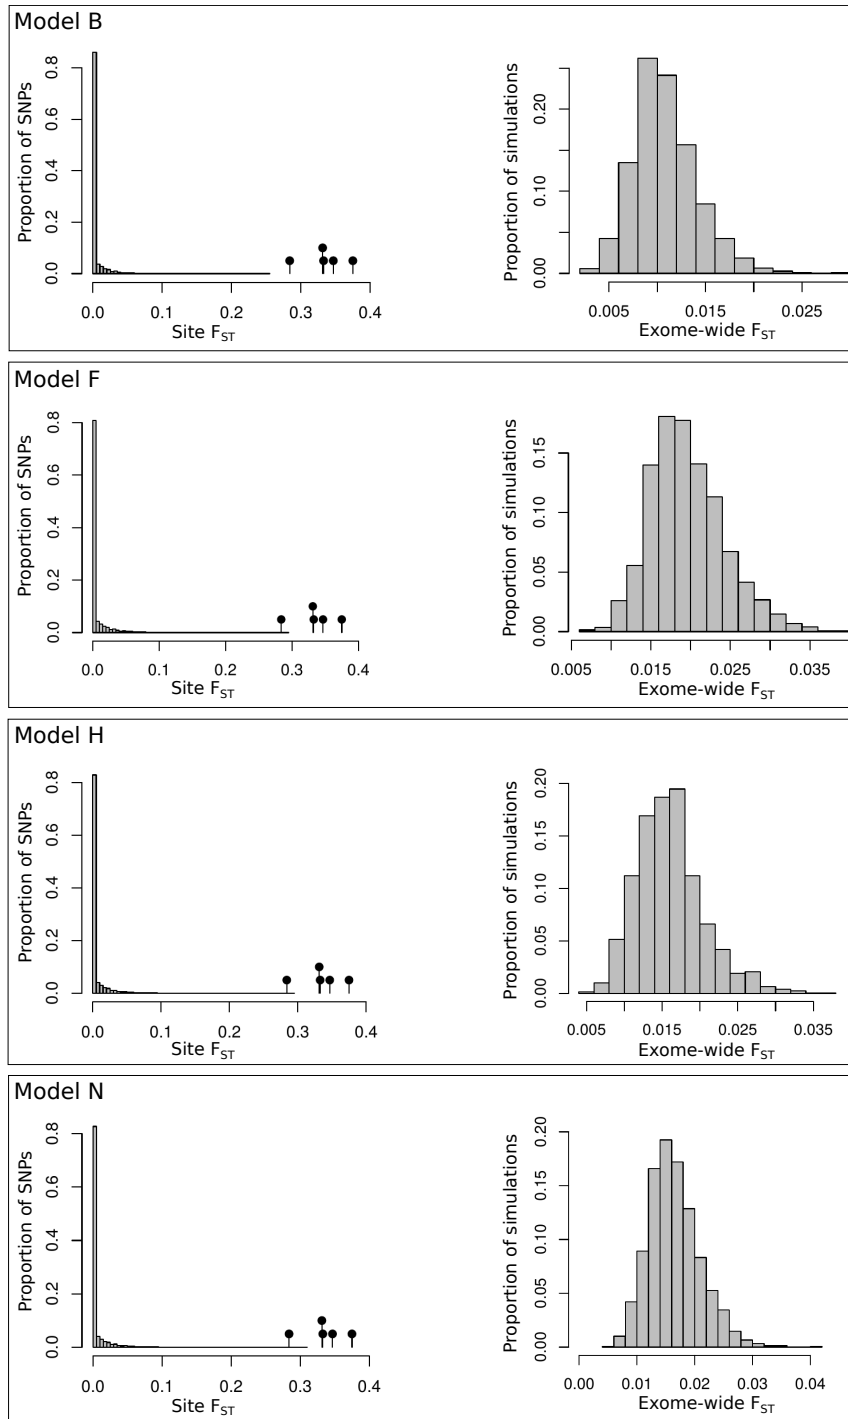

**S9 Fig. Expected  $F_{ST}$  distribution for YNP *T. alpinus* under histories inferred with ABC.** The expected distribution of neutral  $F_{ST}$  per site and exome-wide under the best fitting demographic histories for YNP *T. alpinus* inferred with ABC. Each  $F_{ST}$  distribution was generated from 1,500 simulations under the maximum likelihood histories for the best fitting demographic models for YNP *T. alpinus*, B, F, H, and N. The positions of the five observed  $F_{ST}$  outlier SNPs (see Fig 4) are plotted onto the expected per site  $F_{ST}$  distributions.
