# Supplementary material for: Temporal genomic contrasts reveal rapid evolutionary responses in an alpine mammal during recent climate change
Source: PubMed Central journal article supplement (PMC6519841; doi:10.1371/journal.pgen.1008119), 2019-05-03
Supplement: pgen.1008119.s013.pdf [file pgen.1008119.s013.pdf]

**S3 Table. Individual, contig, and site-level quality filters used for genotyping.**

---

1. Filtering at individual level

---

- (a) Remove individuals having extremely low or high coverage ( $<1/5$  or  $>5$  x the average coverage across all individuals).
  - (b) Remove individuals with excessively high sequencing error rates measured as the percentage of mismatched bases out of the total number of aligned bases in the mitochondrial genome. ( $>3X$  increase in error rates relative to the per individual average – note, no individuals in the current study exceeded this filter threshold)
- 

2. Filtering at contig level

---

- (a) Remove contigs having extremely low ( $<1$ st percentile) or high ( $>99$ th percentile) coverage based on the empirical coverage distribution across contigs.
  - (b) Remove contigs with at least one SNP having allele frequencies highly deviating from Hardy–Weinberg equilibrium expectations ( $p < 0.0001$ ) based on a two-tailed exact test.
  - (c) Retain only the contigs that pass all filters for both historic and contemporary samples
- 

3. Filtering at site level

---

- (a) Remove sites with excessively low ( $<1$ st percentile) or high ( $>99$ th percentile) coverage based on the empirical coverage distribution.
  - (b) Remove sites with biases associated with reference and alternative allele Phred quality ( $1e-100$ ), mapping quality (0), and distance of alleles from the ends of reads (0.0001). Also remove sites that show a bias towards sequencing reads coming from the forward or reverse strand (0.0001).
  - (c) Remove sites for which there are not at least 80% of the individuals sequenced at a minimum of 3x coverage each.
  - (d) Remove sites with a Phred scaled root mean square mapping quality for SNPs below 10.
  - (e) Due to the high base misincorporation rate present in the historic samples, we remove sites from all individuals for which C to T and G to A SNPs are identified.
  - (f) Retain only the sites that pass all filters for both historic and contemporary samples.
-
