# Supplementary material for: Temporal genomic contrasts reveal rapid evolutionary responses in an alpine mammal during recent climate change
Source: PubMed Central journal article supplement (PMC6519841; doi:10.1371/journal.pgen.1008119), 2019-05-03
Supplement: pgen.1008119.s014.pdf [file pgen.1008119.s014.pdf]

**S4 Table. Population genetic summary statistics calculated with ANGSD and ngsTools on quality-filtered data.**

| <b>Populations</b>               | <b>n</b> | <b>S</b> | <b>Private<br/>SNP</b> | <b>% <math>\theta_w</math><br/>Global</b> | <b>% <math>\theta_w</math><br/>Deme</b> | <b>% <math>\theta_\pi</math><br/>Global</b> | <b>% <math>\theta_\pi</math><br/>Deme</b> | <b>Tajima's<br/><i>D</i></b> | <b>Global <math>F_{ST}</math><br/>(0.95 CI)</b> |
|----------------------------------|----------|----------|------------------------|-------------------------------------------|-----------------------------------------|---------------------------------------------|-------------------------------------------|------------------------------|-------------------------------------------------|
| YNP <i>T. speciosus</i> Historic | 52       | 18309    | 2977                   | 0.078                                     | 0.062                                   | 0.057                                       | 0.057                                     | -0.342                       | 0.0274<br>(0.0274-0.0274)                       |
| YNP <i>T. speciosus</i> Modern   | 48       | 17959    | 2627                   | 0.060                                     | 0.052                                   | 0.051                                       | 0.050                                     | -0.362                       | 0.0296<br>(0.0296-0.0296)                       |
| YNP <i>T. alpinus</i> Historic   | 56       | 9495     | 1397                   | 0.042                                     | 0.039                                   | 0.038                                       | 0.038                                     | 0.433                        | 0.0324<br>(0.0324-0.0325)                       |
| YNP <i>T. alpinus</i> Modern     | 48       | 8998     | 900                    | 0.032                                     | 0.030                                   | 0.035                                       | 0.033                                     | 0.518                        | 0.0575<br>(0.0575-0.0575)                       |
| SS <i>T. alpinus</i> Historic    | 52       | 10211    | 2232                   | 0.044                                     | 0.040                                   | 0.043                                       | 0.042                                     | 0.336                        | 0.0344<br>(0.0344-0.0345)                       |
| SS <i>T. alpinus</i> Modern      | 38       | 8722     | 743                    | 0.033                                     | 0.033                                   | 0.038                                       | 0.038                                     | 0.516                        | 0.0438<br>(0.0438-0.0439)                       |

- S = the number of segregating sites
- Private SNP = number of SNP detected only in this population
- $\theta_w$  = Watterson's theta, expressed as a percent for the overall metapopulation (Global) and the average value per deme (Deme).
- $\theta_\pi$  = Pairwise nucleotide diversity, expressed as a percent for the overall metapopulation (Global) and the average value per deme (Deme).
- Tajima's *D* estimated from the overall metapopulation.
