# Supplementary material for: Temporal genomic contrasts reveal rapid evolutionary responses in an alpine mammal during recent climate change
Source: PubMed Central journal article supplement (PMC6519841; doi:10.1371/journal.pgen.1008119), 2019-05-03
Supplement: pgen.1008119.s017.pdf [file pgen.1008119.s017.pdf]

**S7 Table. Demographic model posterior probabilities for three *Tamias* temporal contrasts approximated using the rejection method at a tolerance level of 0.8%.**

| <b>Populations</b>      | <b>A</b> | <b>B</b> | <b>C</b> | <b>D</b> | <b>E</b> | <b>F</b> | <b>G</b> | <b>H</b> | <b>J</b> | <b>N</b> |
|-------------------------|----------|----------|----------|----------|----------|----------|----------|----------|----------|----------|
| YNP <i>T. speciosus</i> | 0.0425   | 0.0231   | -        | 0.2106   | 0.0619   | -        | 0.0862   | 0.2394   | 0.2394   | 0.0969   |
| YNP <i>T. alpinus</i>   | 0.0311   | 0.2011   | 0.0861   | 0.0667   | 0.1222   | 0.1794   | 0.0561   | 0.0478   | -        | 0.2094   |
| SS <i>T. alpinus</i>    | 0.2040   | -        | -        | -        | -        | -        | 0.2120   | 0.1780   | 0.1700   | 0.2360   |
